# Supplementary material for: Antimicrobial Peptides in the Battle against Orthopedic Implant-Related Infections: A Review
Source: MDPI journal article supplement (doi:10.3390/pharmaceutics13111918), 2021-11-12
Supplement: s1 [file s1]

# Supplementary materials: Antimicrobial Peptides in the Battle against Orthopedic Implant-Related Infections: A Review

Bruna Costa, Guillermo Martínez-de-Tejada, Paula A. C. Gomes, M. Cristina L. Martins \* and Fabíola Costa

**Table S1.** Antimicrobial-peptides (AMPs) name and sequence used in the different works reviewed.

| AMPs                          | Sequence                                                                                                                                                                                                                                                                                                                                                                                                                                                                                                                                                                      | Refs             |
|-------------------------------|-------------------------------------------------------------------------------------------------------------------------------------------------------------------------------------------------------------------------------------------------------------------------------------------------------------------------------------------------------------------------------------------------------------------------------------------------------------------------------------------------------------------------------------------------------------------------------|------------------|
| <b>hLF1-11</b>                | GRRRRSVQWCA                                                                                                                                                                                                                                                                                                                                                                                                                                                                                                                                                                   | [51-54, 126]     |
| Modified hLF1-11              | MPA <sup>δ</sup> -PEG <sup>φ</sup> -GRRRRSVQWCA-NH <sub>2</sub>                                                                                                                                                                                                                                                                                                                                                                                                                                                                                                               | [102]            |
| Modified hLF1-11              | MPA <sup>δ</sup> -Ahx <sup>τ</sup> -Ahx-Ahx-GRRRRSVQWCA-NH <sub>2</sub>                                                                                                                                                                                                                                                                                                                                                                                                                                                                                                       | [108]            |
| Tet213                        | KRWWKWWRR                                                                                                                                                                                                                                                                                                                                                                                                                                                                                                                                                                     | [57,59, 64, 106] |
| HHC36                         | KRWWKWWRR                                                                                                                                                                                                                                                                                                                                                                                                                                                                                                                                                                     | [59-61]          |
| HHC36                         | KRWWKWWRR-NH <sub>2</sub>                                                                                                                                                                                                                                                                                                                                                                                                                                                                                                                                                     | [56, 58]         |
| Dhvar-5                       | LLLFLKKRKKRKY                                                                                                                                                                                                                                                                                                                                                                                                                                                                                                                                                                 | [49-50 127-128]  |
| Halactine-2 analogues         | I/H27: GKWMKLLKKILK-NH <sub>2</sub><br>II: gkwmlkkilk-NH <sub>2</sub><br>III: GKWKLLKKILK-NH <sub>2</sub><br>IV: GKWMKMLKKILK-NH <sub>2</sub><br>V: GKWLKLLKKILK-NH <sub>2</sub><br>VI/H39: GKWKLLKKILK-NH <sub>2</sub><br>VII: gkwvklkkilk-NH <sub>2</sub><br>VIII: GKWMKLLKKILK-NH <sub>2</sub><br>IX: KWMKLLKKILK-NH <sub>2</sub><br>X: kwmklkkilk-NH <sub>2</sub><br>XI: βA <sup>α</sup> KWMKLLKKILK-NH <sub>2</sub><br>XII: βakwmklkkilk-NH <sub>2</sub><br>H27D: Gkwmlkkilk- NH <sub>2</sub><br>H39D: Gkwvklkkilk-NH <sub>2</sub><br>H39LD: GKwVklKkLiK-NH <sub>2</sub> | [29, 55]         |
| GL13K                         | GKIIKLKASLKLL-NH <sub>2</sub>                                                                                                                                                                                                                                                                                                                                                                                                                                                                                                                                                 | [27, 104]        |
| Modified GL13K                | GKIIKLKASLKLL-CONH <sub>2</sub>                                                                                                                                                                                                                                                                                                                                                                                                                                                                                                                                               | [95, 96]         |
| RRP9W4N                       | RRPRPRPRPWWWW-NH <sub>2</sub>                                                                                                                                                                                                                                                                                                                                                                                                                                                                                                                                                 | [79]             |
| Cateslytin                    | RSMRLSFRARGYGFR                                                                                                                                                                                                                                                                                                                                                                                                                                                                                                                                                               | [62]             |
| AMP2                          | KRRWRIWLV -(CO)NH <sub>2</sub>                                                                                                                                                                                                                                                                                                                                                                                                                                                                                                                                                | [83]             |
| β-peptide                     | (ACHC <sup>ω</sup> - β <sup>3</sup> hV- β <sup>3</sup> hK) <sub>3</sub>                                                                                                                                                                                                                                                                                                                                                                                                                                                                                                       | [32]             |
| OP-145                        | Ac-IGKEFKRIVERIKRFLRELVRPLR-NH <sub>2</sub>                                                                                                                                                                                                                                                                                                                                                                                                                                                                                                                                   | [77]             |
| SAAP-145                      | Ac-LKRLYKRLAKLIKRLRYRLKKPVR-NH <sub>2</sub>                                                                                                                                                                                                                                                                                                                                                                                                                                                                                                                                   | [63]             |
| SAAP-276                      | Ac-LKRVWKA VFKLLKRYWRQLKKPVR-NH <sub>2</sub>                                                                                                                                                                                                                                                                                                                                                                                                                                                                                                                                  | [63]             |
| LL-37                         | CLLGDFFRKSKEKIGKEFKRIVQRIKDFLRNLVPRTE                                                                                                                                                                                                                                                                                                                                                                                                                                                                                                                                         | [98]             |
| KR-12                         | KRIVQRIKDFLR-NH <sub>2</sub>                                                                                                                                                                                                                                                                                                                                                                                                                                                                                                                                                  | [89]             |
| FK-16                         | FKRIVQRIKDFLRNLV-NH <sub>2</sub>                                                                                                                                                                                                                                                                                                                                                                                                                                                                                                                                              | [99]             |
| GZ3.163                       | 4-methylhexanoyl-CdabDabDabLfDabDabL-NH <sub>2</sub>                                                                                                                                                                                                                                                                                                                                                                                                                                                                                                                          | [97]             |
| Melimine                      | CTLISWIKNRKQRPVSRRRRRRGRRRR                                                                                                                                                                                                                                                                                                                                                                                                                                                                                                                                                   | [101]            |
| JH8194                        | KRLFRRWQWRMKKY                                                                                                                                                                                                                                                                                                                                                                                                                                                                                                                                                                | [103, 113]       |
| Cecropin B                    | KWKVFKKIEKMGRNIRNGIVKAGPAIAVLGEAKAL-NH <sub>2</sub>                                                                                                                                                                                                                                                                                                                                                                                                                                                                                                                           | [120]            |
| Bacitracin                    | CLelIecy(LOrnIfHaA)                                                                                                                                                                                                                                                                                                                                                                                                                                                                                                                                                           | [105,121]        |
| Chimeric peptides             | LKLLKKLLKLLKKL                                                                                                                                                                                                                                                                                                                                                                                                                                                                                                                                                                | [111-112]        |
|                               | KWKRWWWWRR                                                                                                                                                                                                                                                                                                                                                                                                                                                                                                                                                                    | [111]            |
| Magainin I                    | GIGKFLHSAGKF-GKAFVGEIMKS                                                                                                                                                                                                                                                                                                                                                                                                                                                                                                                                                      | [116]            |
| SYM11K                        | KKFPWWWPFFK                                                                                                                                                                                                                                                                                                                                                                                                                                                                                                                                                                   |                  |
| L <sub>9</sub> K <sub>6</sub> | LKLLKKLLKLLKLL                                                                                                                                                                                                                                                                                                                                                                                                                                                                                                                                                                | [117]            |
| LASIO III                     | VNWKILGKIIVK                                                                                                                                                                                                                                                                                                                                                                                                                                                                                                                                                                  |                  |

|                  |                               |       |
|------------------|-------------------------------|-------|
| Tet20            | KRWRIRVRVIRKC                 | [107] |
| HHC10-derivative | H-KRWWKWIRW-NH <sub>2</sub>   | [130] |
| -                | CLATTLTAT-NH <sub>2</sub>     | [125] |
| E14LKK           | LKKLLKLLKLLKL                 | [132] |
| Anoplin          | GLLKRIKTLL                    | [134] |
| KSLW             | KKVVFVVKFK                    | [115] |
| -                | RRRRRRGALAGRRIIRRGALAGEEEEEEE | [139] |

Note: d-amino acids are shown in lower case letters; <sup>δ</sup>MPA, 3-mercaptopropionic acid; <sup>φ</sup>PEG, 2 units of 8-amino-3,6-dioxaoctanoic acid; <sup>γ</sup>6-aminohexanoic acid; <sup>β</sup>A, beta-alanine; <sup>ψ</sup> aminocyclohexanecarboxylic acid.
